# Supplementary material for: Scalable growth of single-walled carbon nanotubes with a highly uniform structure
Source: Royal Society of Chemistry journal article supplement (doi:10.1039/d0nr01919d), 2020-01-01
Supplement: d0nr01919d10.pdf [file d0nr01919d10.pdf]

---

| Carbon source and promoter                               | Chiral Angle (Standard Deviation) degree | Diameter (Standard Deviation) nm | Maximum Enrichment of Single Chirality | Reference    |
|----------------------------------------------------------|------------------------------------------|----------------------------------|----------------------------------------|--------------|
| C <sub>2</sub> H <sub>5</sub> OH                         | 20.00 ± 7.99                             | 1.67 ± 0.22                      | 4.7% of (14,9)                         | 1            |
| CO, 0.25% CO <sub>2</sub>                                | 23.25 ± 5.80                             | 1.25 ± 0.12                      | 8.33% of (9,8)                         | 2            |
| CO, 0% CO <sub>2</sub>                                   | 23.50 ± 4.90                             | 1.07 ± 0.17                      | 13.33% of (8,7)                        | 2            |
| CO, CO <sub>2</sub> at 880 C                             | -----                                    | 1.35 ± 0.072                     | 17% of (11,8)                          | 3            |
| CO, 500 ppm NH <sub>3</sub>                              | -----                                    | -----                            | 10% of (13,12)                         | 4            |
| C <sub>2</sub> H <sub>4</sub>                            | 13.00 ± 9.00                             | 1.50 ± 0.27                      | 5.7% of (12,9)                         | 5            |
| C <sub>2</sub> H <sub>4</sub> , 300 ppm H <sub>2</sub> O | 25.35 ± 4.11                             | 1.20 ± 0.15                      | 11% of (9,8)                           | Current Work |
| C <sub>2</sub> H <sub>4</sub> , 115 ppm H <sub>2</sub> O | 25.92 ± 4.97                             | 1.10 ± 0.12                      | 27% of (9,8)                           | Current Work |

---
