# Supplementary figures and images for: Scalable growth of single-walled carbon nanotubes with a highly uniform structure
Source: Royal Society of Chemistry journal article supplement (doi:10.1039/d0nr01919d), 2020-01-01

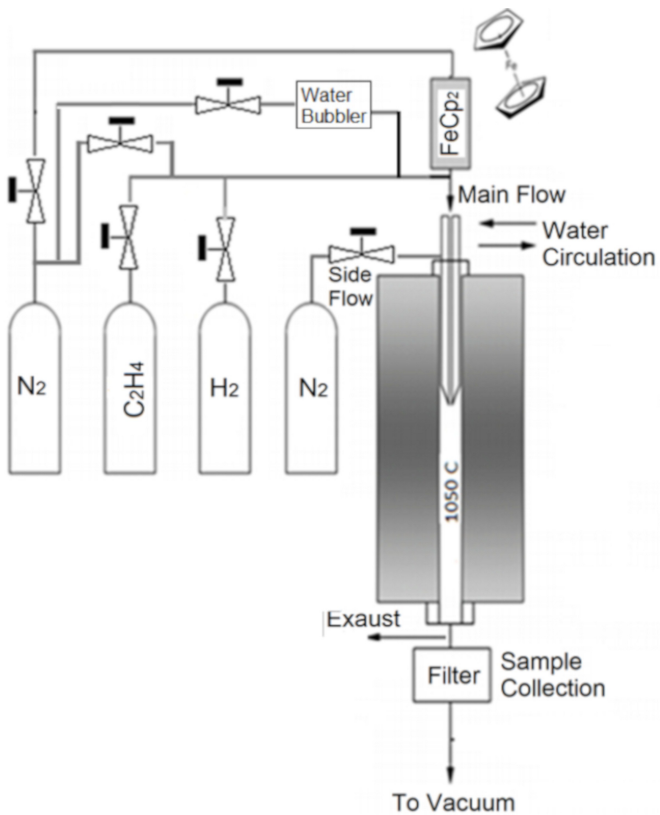

Supplement: d0nr01919d2.pdf [file d0nr01919d2.pdf]

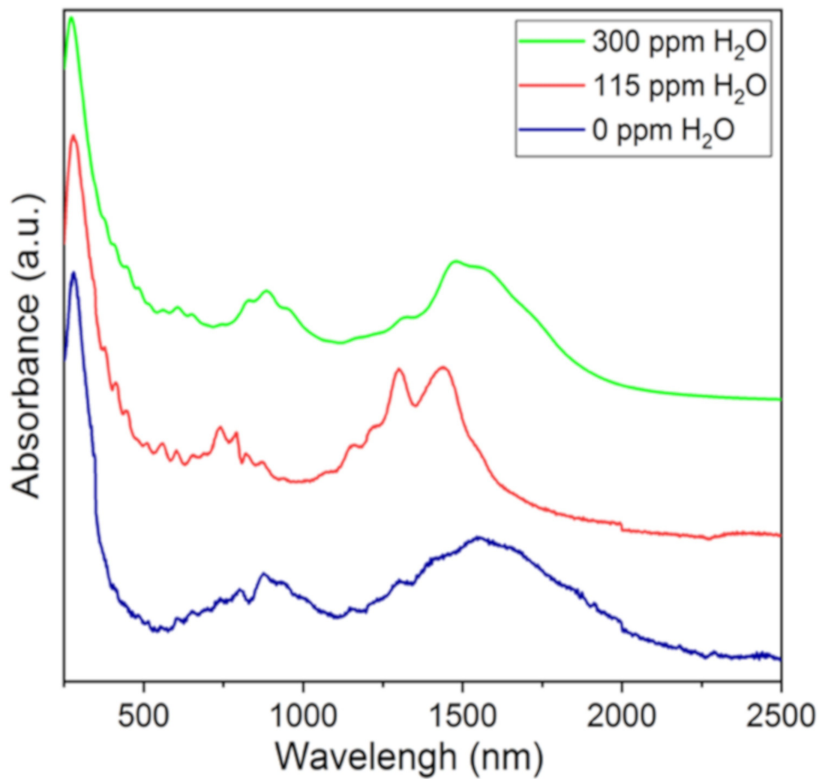

Supplement: d0nr01919d4.pdf [file d0nr01919d4.pdf]

a)

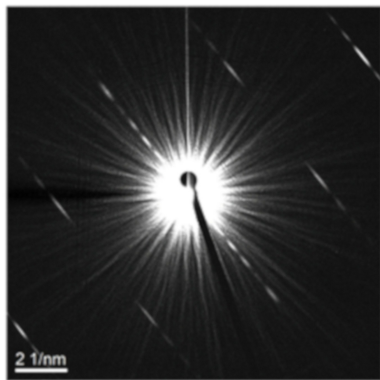

b)

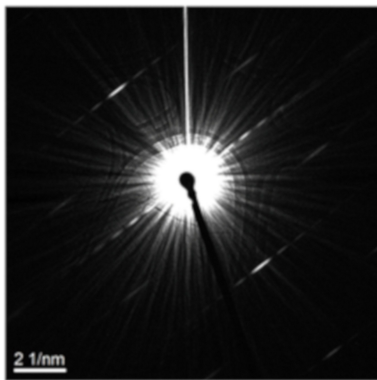

c)

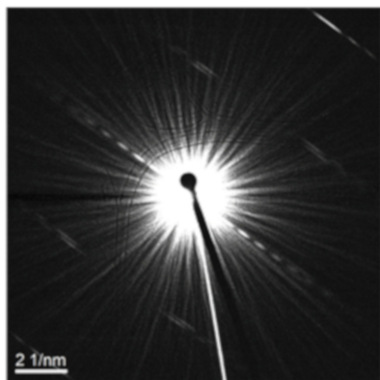

d)

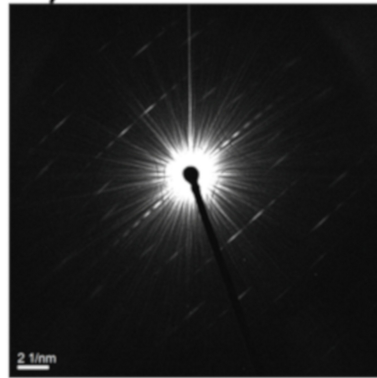

Supplement: d0nr01919d6.pdf [file d0nr01919d6.pdf]

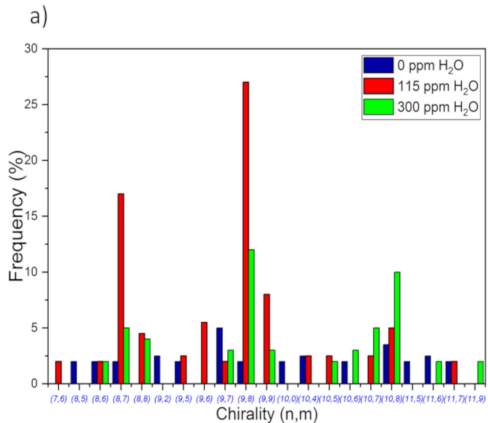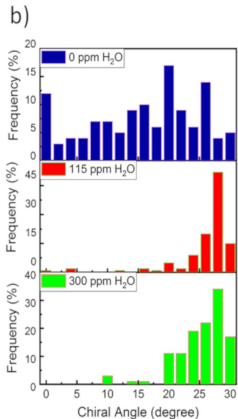

Supplement: d0nr01919d7.pdf [file d0nr01919d7.pdf]

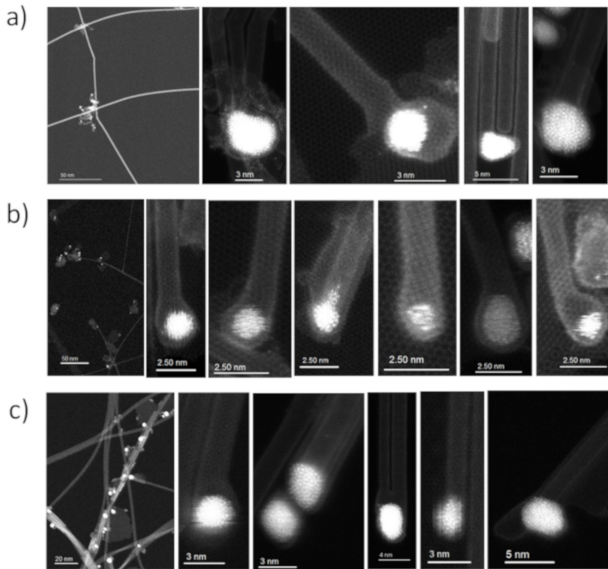

Supplement: d0nr01919d8.pdf [file d0nr01919d8.pdf]
